# Supplementary material
Source: PubMed Central journal article supplement (PMC3251157)
Supplement: 1112831108_pnas.1112831108_SI.pdf [file 1112831108_pnas.1112831108_SI.pdf]

# Supporting Information

Jo et al. 10.1073/pnas.1112831108

## SI Materials and Methods

**Materials.** We obtained 25-hydroxycholesterol (25-HC) from Steraloids, Inc. (Wilton, NH), MG-132 from Boston Biochem (Cambridge, MA) and Peptides International (Osaka, Japan), digitonin from Calbiochem, and horseradish peroxidase-conjugated donkey antimouse and antirabbit from Jackson Immuno-Research Laboratories (West Grove, PA). Other reagents were obtained from previously described sources (1). Lipoprotein-deficient serum (LPDS,  $d > 1.215$  g/mL) was prepared from newborn calf serum by ultracentrifugation as described (2).

**Expression Plasmids.** The following plasmids have been described in the indicated reference: pCMV-HMG-Red-T7 encodes full-length hamster reductase followed by three copies of a T7 epitope tag under transcriptional control of the cytomegalovirus (CMV) promoter (3); pCMV-Insig-1-T7 encoding human Insig-1 fused to three copies of a T7 epitope and pCMV-Insig-2-T7, encoding human Insig-2 followed by three T7 epitopes (4); pCMV-gp78-Myc encodes human gp78 followed by five copies of a c-Myc epitope (5); pCMV-Hrd1-Myc encoding human Hrd1 fused to three copies of the c-Myc epitope and pCMV-Trc8-Myc, which encodes human Trc8, followed by five copies of the c-Myc epitope (6).

**Primary Antibodies.** Antibodies used for immunoblot analysis include: IgG-9E10, mouse monoclonal antibody against c-Myc purified from the culture medium of hybridoma clone 9E10 (American Type Culture Collection); monoclonal anti-T7 Tag IgG (Novagen); IgG-A9, mouse monoclonal antibody against the catalytic domain of hamster reductase (7); IgG-P4D1, mouse monoclonal antibody against bovine ubiquitin (Santa Cruz Biotechnology); rabbit polyclonal anti-Ubx8 IgG (Abnova); IgG-740F, rabbit polyclonal antibody against human gp78 (4); IgG-R139, a rabbit polyclonal antibody against hamster Scap (8); and IgG-3D10, a mouse monoclonal antibody against human Trc8 (Abnova). Rabbit polyclonal antibody against human Trc8 (designated IgG-556) was generated by immunizing animals with

a recombinant protein consisting of glutathione S-transferase fused to amino acids 545–654 of human Trc8. IgG-17H1 is a mouse monoclonal antibody against human Insig-1 that was generated by immunizing animals with recombinant, His-tagged human Insig-1 (amino acids 1–277) produced in Sf9 cells.

**RNA Interference.** Duplexes of small interfering RNAs (siRNAs) were designed and synthesized by Dharmacon/Thermo Fisher Scientific. SV-589 cells were set up on day 0 as indicated in the legend to Fig. 2. On day 1, the cells were incubated with 200–600 pmol of siRNA duplexes (GFP, CAGCCACAACGTCTA TATC; Trc8A, CAAUGAAACUCCAGAGGAA; Trc8B, GCUA-AGACCAGAAGAGAGA; Trc8C, GGGCAUGAGUGCUGU-AAUU; Trc8D, GGGAAUUGAACGAAGAUGA; Trc8E, GA-GUUGUAAUGUUUGGAAA; gp78A, CATGCAGAATGTC-TCTTAA; gp78B, TGCACACCTTGGCTTTCAT; gp78C, GTT-TGGCCCTCTTCGAGTG; gp78D, ATTGCACACCTTGGCT-TTCA; Insig-1, CCCACAAATTTAAGAGAGA; Insig-2, CTAAGTGGATTTTCGATAA and TGGCAATGTACGAATGTAA) mixed with Lipofectamine™ RNAiMAX (Invitrogen) diluted in OPTI-MEM I reduced serum medium (Gibco) according to the manufacturer's procedure. Following incubation for 6 h at 37 °C, FCS was added to a final concentration of 10%. On day 2 or 3, the RNAi procedure was repeated as described above, except that the cells were incubated for 16 h at 37 °C in medium B containing 10% LPDS, 50 μM compactin and 50 μM mevalonate. The cells were subsequently treated and harvested for analysis as described in the figure legend to Fig. 2.

**Real-Time PCR.** Total RNA was isolated using RNA STAT60 (Tel-Test) according to manufacturer's procedures. Knockdown efficiency was verified by quantitative real-time PCR using each specific primer for human Trc8, gp78, and the control mRNA GAPDH.

1. DeBose-Boyd RA, Brown MS, Li WP, Nohturfft A, Goldstein JL, Espenshade PJ (1999) Transport-dependent proteolysis of SREBP: relocation of site-1 protease from Golgi to ER obviates the need for SREBP transport to Golgi. *Cell* 99:703–712.
2. Goldstein JL, Basu SK, Brown MS (1983) Receptor-mediated endocytosis of low-density lipoprotein in cultured cells. *Methods Enzymol* 98:241–260.
3. Sever N, Yang T, Brown MS, Goldstein JL, DeBose-Boyd RA (2003) Accelerated degradation of HMG CoA reductase mediated by binding of insig-1 to its sterol-sensing domain. *Mol Cell* 11:25–33.
4. Lee JN, Song B, DeBose-Boyd RA, Ye J (2006) Sterol-regulated degradation of Insig-1 mediated by the membrane-bound ubiquitin ligase gp78. *J Biol Chem* 281:39308–39315.
5. Song BL, Sever N, DeBose-Boyd RA (2005) Gp78, a membrane-anchored ubiquitin ligase, associates with Insig-1 and couples sterol-regulated ubiquitination to degradation of HMG CoA reductase. *Mol Cell* 19:829–840.
6. Jo Y, Sguigna PV, DeBose-Boyd RA (2011) Membrane-associated ubiquitin ligase complex containing gp78 mediates sterol-accelerated degradation of 3-hydroxy-3-methylglutaryl-coenzyme A reductase. *J Biol Chem* 286:15022–15031.
7. Liscum L, Luskey KL, Chin DJ, Ho YK, Goldstein JL, Brown MS (1983) Regulation of 3-hydroxy-3-methylglutaryl coenzyme A reductase and its mRNA in rat liver as studied with a monoclonal antibody and a cDNA probe. *J Biol Chem* 258:8450–8455.
8. Sakai J, Nohturfft A, Goldstein JL, Brown MS (1998) Cleavage of sterol regulatory element-binding proteins (SREBPs) at site-1 requires interaction with SREBP cleavage-activating protein. Evidence from in vivo competition studies. *J Biol Chem* 273:5785–5793.
